# Supplementary material
Source: PubMed Central journal article supplement (PMC3075851)
Supplement: NIHMS286319-supplement-Cation_SI.pdf [file NIHMS286319-supplement-Cation_SI.pdf]

Supporting Information

© Wiley-VCH 2010

69451 Weinheim, Germany

**1,2-Azaborine Cations\*\***

*Adam J. V. Marwitz, Jesse T. Jenkins, Lev N. Zakharov, and Shih-Yuan Liu\**

anie\_201004084\_sm\_miscellaneous\_information.pdf

# Supporting Information

| <b>Index</b>             | <b>Page</b> |
|--------------------------|-------------|
| General                  | S2          |
| Synthesis of <b>2-4</b>  | S3-S5       |
| UV-Vis/Fluorescence Data | S6-S7       |

## ***General***

All oxygen- and moisture-sensitive manipulations were carried out under an inert atmosphere using either standard Schlenk techniques or a glove box.

THF, Et<sub>2</sub>O, CH<sub>2</sub>Cl<sub>2</sub>, and pentane were purified by passing through a neutral alumina column under argon. Cyclohexene was dried over CaH<sub>2</sub> and distilled under N<sub>2</sub> prior to use.

All chemicals and solvents were purchased (Aldrich or Strem) and used as received.

<sup>11</sup>B NMR spectra were recorded on a Varian Unity/Inova 600 spectrometer at ambient temperature. <sup>1</sup>H NMR spectra were recorded on a Varian Unity/Inova 300 or Varian Unity/Inova 600 spectrometer. <sup>13</sup>C NMR spectra were recorded on a Varian Unity/Inova 300 spectrometer or Varian Unity/Inova 500 spectrometer. <sup>11</sup>B NMR spectra were externally referenced to BF<sub>3</sub>•Et<sub>2</sub>O (δ 0).

IR spectra were recorded on a Nicolet Magna 550 FT-IR instrument with OMNIC software. UV-Vis spectra were recorded on an Agilent 8453 spectrometer with ChemStation software. Fluorescence spectra were recorded on a Horiba Jobin-Yvon Fluoromax 4 fluorometer equipped with an integrating sphere. Quantum yields are reported as the average of 3 runs.

High-resolution mass spectroscopy data were obtained at the Mass Spectroscopy Facilities and Services Core of the Environmental Health Sciences Center at Oregon State University. Financial support for this facility has been furnished in part by the National Institute of Environmental Health Sciences, NIH (P30 ES00210).

## Synthesis

### Scheme 2

**Compound 2.** In a glovebox, a solution of **1**<sup>1</sup> (0.600 g, 4.24 mmol in 25.0 mL benzene) was added dropwise to a stirring suspension of AgOTf (1.31 g, 5.09 mmol in 25.0 mL benzene). The reaction was stirred at rt for 8 h, whereupon the solvent was removed under reduced pressure. Compound **2** was purified by vacuum distillation (bp 35 °C, 100 mTorr) from the resulting crude material as a clear, colorless liquid (0.639 g, 59%).

<sup>1</sup>H NMR (600 MHz, CD<sub>2</sub>Cl<sub>2</sub>): δ 7.76 (br m, 1H), 7.21 (d, <sup>3</sup>J<sub>HH</sub> = 6.3 Hz, 1H), 6.65 (d, <sup>3</sup>J<sub>HH</sub> = 11.4 Hz, 1H), 6.39 (ddd, <sup>3</sup>J<sub>HH</sub> = 11.4, 6.3, 3.2 Hz, 1H), 3.78 (q, <sup>3</sup>J<sub>HH</sub> = 7.3 Hz, 2H), 1.34 (t, <sup>3</sup>J<sub>HH</sub> = 7.3 Hz, 3H). <sup>13</sup>C NMR (75 MHz, CD<sub>2</sub>Cl<sub>2</sub>): δ 148.6, 138.9, 119 (br), 119 (q, <sup>1</sup>J<sub>CF</sub> = 318 Hz), 111.5, 46.5, 17.7. <sup>11</sup>B NMR (192.5 MHz, CD<sub>2</sub>Cl<sub>2</sub>): δ 28.0. FTIR (thin film) 3139, 3080, 2986, 2939, 2908, 2880, 1870, 1764, 1611, 1528, 1481, 1456, 1444, 1413, 1351, 1209, 1153, 1112, 1060, 1006, 944, 830, 785, 768, 747, 684, 618, 572, 518, 448 cm<sup>-1</sup>.

### Scheme 3

**Compound 3a.** In a glove box, a solution of 4-methylpyridine (0.047 g, 0.51 mmol in 1.0 mL CH<sub>2</sub>Cl<sub>2</sub>) was added to a stirring solution of **2** (0.100 g, 0.392 mmol in 1.0 mL CH<sub>2</sub>Cl<sub>2</sub>). The reaction was stirred for 1 h at rt. Subsequently, the solvents and all volatiles were removed under reduced pressure. The resulting material was washed with pentane (3 x 5 mL) to give **3a** as a light-yellow crystalline solid (0.130 g, 95%).

<sup>1</sup>H NMR (600 MHz, CD<sub>2</sub>Cl<sub>2</sub>): δ 8.64 (d, <sup>3</sup>J<sub>HH</sub> = 6.2 Hz, 2H), 8.01 (d, <sup>3</sup>J<sub>HH</sub> = 6.2 Hz, 2H), 7.96 (dd, <sup>3</sup>J<sub>HH</sub> = 10.5, 7.1 Hz, 1H), 7.54 (d, <sup>3</sup>J<sub>HH</sub> = 7.6, 1H), 6.80 (app t, <sup>3</sup>J<sub>HH</sub> = 6.8 Hz, 1H), 6.75 (d, <sup>3</sup>J<sub>HH</sub> = 10.5 Hz, 1H), 3.72 (q, <sup>3</sup>J<sub>HH</sub> = 7.3 Hz, 2H), 2.72 (s, 3H), 1.30 (t, <sup>3</sup>J<sub>HH</sub> = 7.3 Hz, 3H). <sup>13</sup>C NMR (75 MHz, CD<sub>2</sub>Cl<sub>2</sub>): δ 161.2, 149.2, 144.8, 139.5, 129.4, 124 (br), 121 (q, <sup>1</sup>J<sub>CF</sub> = 320 Hz), 115.5, 47.4, 22.7, 17.9. <sup>11</sup>B NMR (192.5 MHz, CD<sub>2</sub>Cl<sub>2</sub>): δ 30.9. FTIR (thin film) 3112, 3087, 3042, 2976, 2939, 2883, 2309, 1972, 1820, 1707, 1639, 1607, 1528, 1452, 1412, 1388, 1368, 1334, 1267, 1145, 1086, 1028, 989, 858, 832, 806, 767, 754, 738, 720, 700, 661, 636 cm<sup>-1</sup>.

**Compound 3b.** In a glove box, a solution of 4-phenylpyridine (0.073 g, 0.47 mmol in 1.0 mL CH<sub>2</sub>Cl<sub>2</sub>) was added to a stirring solution of **2** (0.100 g, 0.392 mmol in 1.0 mL CH<sub>2</sub>Cl<sub>2</sub>). The reaction was stirred for 1 h at rt, whereupon the product was crystallized by cooling the reaction to -20 °C for 24 h. The supernatant was decanted and the crystallized product was washed with pentane (3 x 5 mL). Residual solvents were removed under reduced pressure to provide **3b** as clear, colorless crystals (0.155 g, 97%).

---

(1) A. J. V. Marwitz, E. R. Abbey, J. T. Jenkins, L. N. Zakharov, S.-Y. Liu *Org. Lett.* **2007**, *9*, 4905-4908.

$^1\text{H}$  NMR (600 MHz,  $\text{CD}_2\text{Cl}_2$ ):  $\delta$  8.82 (d,  $^3J_{\text{HH}} = 6.9$  Hz, 2H), 8.44 (d,  $^3J_{\text{HH}} = 6.9$  Hz, 2H), 8.02 (dd,  $^3J_{\text{HH}} = 9.8, 6.6$  Hz, 1H), 7.97 (dd,  $^3J_{\text{HH}} = 8.1$  Hz,  $^4J_{\text{HH}} = 1.7$  Hz, 2H), 7.68 (m, 3H), 7.55 (d,  $^3J_{\text{HH}} = 6.6$ , 1H), 6.85 (app t,  $^3J_{\text{HH}} = 7.5$  Hz, 2H), 3.83 (q,  $^3J_{\text{HH}} = 7.3$  Hz, 2H), 1.38 (t,  $^3J_{\text{HH}} = 7.3$  Hz, 3H).  $^{13}\text{C}$  NMR (75 MHz,  $\text{CD}_2\text{Cl}_2$ ):  $\delta$  158.1, 149.5, 145.8, 139.6, 134.3, 133.2, 130.5, 128.7, 125.7, 124 (br), 115.7, 47.7, 18.2.  $^{11}\text{B}$  NMR (192.5 MHz,  $\text{CD}_2\text{Cl}_2$ ):  $\delta$  31.0. FTIR (thin film) 3220, 3138, 3078, 2915, 1638, 1612, 1513, 1488, 1474, 1442, 1412, 1377, 1349, 1292, 1233, 1218, 1174, 1151, 1029, 833, 765, 736, 693  $\text{cm}^{-1}$ . HRMS (EI) calcd for  $\text{C}_7\text{H}_9\text{BNO}_3\text{SF}_3$  (M<sup>+</sup>) 255.03484, found 255.03528.

**Compound 3c.** In a glove box, a solution of pyridine (0.040 g, 0.51 mmol in 1.0 mL  $\text{CH}_2\text{Cl}_2$ ) was added to a stirring solution of **2** (0.100 g, 0.392 mmol in 1.0 mL  $\text{CH}_2\text{Cl}_2$ ). The reaction was stirred for 1 h at rt. Subsequently, the solvents and all volatiles were removed under reduced pressure. The resulting material was washed with pentane (3 x 5 mL) to provide **3c** as a light-yellow crystalline solid (0.125 g, 95%).

$^1\text{H}$  NMR (600 MHz,  $\text{CD}_2\text{Cl}_2$ ):  $\delta$  8.85 (dd,  $^3J_{\text{HH}} = 6.1$  Hz,  $^4J_{\text{HH}} = 0.9$  Hz, 2H), 8.65 (tt,  $^3J_{\text{HH}} = 7.2$  Hz,  $^4J_{\text{HH}} = 0.9$  Hz, 1H), 8.25 (dd,  $^3J_{\text{HH}} = 7.2, 6.1$  Hz, 2H), 7.98 (dd,  $^3J_{\text{HH}} = 11.4, 7.0$  Hz, 1H), 7.55 (d,  $^3J_{\text{HH}} = 6.4$  Hz, 1H), 6.83 (dt,  $^3J_{\text{HH}} = 7.0, 1.1$  Hz, 1H), 6.77 (dd,  $^3J_{\text{HH}} = 11.4, 1.1$  Hz, 1H), 3.72 (q,  $^3J_{\text{HH}} = 7.3$  Hz, 2H), 1.30 (t,  $^3J_{\text{HH}} = 7.3$  Hz, 3H).  $^{13}\text{C}$  NMR (75 MHz,  $\text{CD}_2\text{Cl}_2$ ):  $\delta$  149.4, 147.0, 146.0, 139.5, 129.0, 125 (br), 121 (q,  $^1J_{\text{CF}} = 321$  Hz), 115.7, 47.5, 17.9.  $^{11}\text{B}$  NMR (192.5 MHz,  $\text{CD}_2\text{Cl}_2$ ):  $\delta$  30.9. FTIR (thin film) 3116, 3073, 3048, 2985, 1969, 1909, 1799, 1611, 1526, 1463, 1412, 1391, 1360, 1334, 1282, 1226, 1162, 1123, 1081, 1030, 988, 784, 758, 698, 685, 638, 599, 573  $\text{cm}^{-1}$ .

**Compound 3d.** In a glove box, a solution of 4-trifluoromethylpyridine (0.075 g, 0.51 mmol in 1.0 mL  $\text{CH}_2\text{Cl}_2$ ) was added to a stirring solution of **2** (0.100 g, 0.392 mmol in 1.0 mL  $\text{CH}_2\text{Cl}_2$ ). The reaction was stirred for 4 h at rt. Subsequently, the solvents and all volatiles were removed under reduced pressure. The resulting material was washed with pentane (3 x 5 mL) to give **3d** as a bright-yellow crystalline solid (0.142 g, 90%).

$^1\text{H}$  NMR (600 MHz,  $\text{CD}_2\text{Cl}_2$ ):  $\delta$  9.10 (d,  $^3J_{\text{HH}} = 5.0$  Hz, 2H), 8.27 (br m, 2H), 7.96 (dd,  $^3J_{\text{HH}} = 10.6, 7.4$  Hz, 1H), 7.48 (d,  $^3J_{\text{HH}} = 7.1$ , 1H), 6.80 (d,  $^3J_{\text{HH}} = 10.6$  Hz, 1H), 6.75 (br m, 1H), 3.77 (q,  $^3J_{\text{HH}} = 7.3$  Hz, 2H), 1.33 (t,  $^3J_{\text{HH}} = 7.3$  Hz, 3H).  $^{13}\text{C}$  NMR (75 MHz,  $\text{CD}_2\text{Cl}_2$ ):  $\delta$  149.5, 148.9, 139.5, 124.3, 122 (br), 120.2, 115.1, 47.4, 18.0 (R-CF<sub>3</sub> carbons not observed).  $^{11}\text{B}$  NMR (192.5 MHz,  $\text{CD}_2\text{Cl}_2$ ):  $\delta$  30.0. FTIR (thin film) 3054, 2987, 2361, 2306, 1653, 1609, 1559, 1521, 1473, 1456, 1321, 1264, 1166, 1081, 1031, 896, 740, 639, 574, 518  $\text{cm}^{-1}$ .

**Compound 3e.** In a glove box, a solution of 4-(N,N-dimethyl)pyridine (0.057 g, 0.47 mmol in 1.0 mL  $\text{CH}_2\text{Cl}_2$ ) was added to a stirring solution of **2** (0.100 g, 0.392 mmol in 1.0 mL  $\text{CH}_2\text{Cl}_2$ ). The reaction was stirred for 1 h at rt, whereupon the solvent was removed under reduced pressure. The product was washed with  $\text{Et}_2\text{O}$  (3 x 5 mL) providing **3e** as an oil. Crystallization of **3e** was initiated by adding a seed crystal of **3b**, which was later removed. The resultant tan solid of **3e** was washed with  $\text{Et}_2\text{O}$  (3 x 5 mL) and residual solvent was removed under reduced pressure to provide **3e** as an off-white crystalline solid (0.144 g, 98%).

$^1\text{H}$  NMR (600 MHz,  $\text{CD}_2\text{Cl}_2$ ):  $\delta$  7.98 (d,  $^3J_{\text{HH}} = 6.9$  Hz, 2H), 7.71 (d,  $^3J_{\text{HH}} = 6.6$  Hz, 1H), 7.28 (d,  $^3J_{\text{HH}} = 6.6$  Hz, 1H), 6.90 (d,  $^3J_{\text{HH}} = 6.9$  Hz, 2H), 6.48 (d,  $^3J_{\text{HH}} = 13.0$  Hz, 1H), 6.41 (m, 1H), 3.67 (q,  $^3J_{\text{HH}} = 7.3$  Hz, 2H), 3.23 (s, 6H), 1.22 (t,  $^3J_{\text{HH}} = 7.3$  Hz, 3H).  $^{13}\text{C}$  NMR (125 MHz,  $\text{CD}_2\text{Cl}_2$ ):  $\delta$  156.8, 145.0, 143.7, 138.9, 124 (br), 121 (q,  $^1J_{\text{CF}} = 321$  Hz), 110.2, 108.4, 46.7, 40.4, 17.6.  $^{11}\text{B}$  NMR (192.5 MHz,  $\text{CD}_2\text{Cl}_2$ ):  $\delta$  26.7. FTIR (thin film) 3230, 3094, 2976, 2935, 2873, 2822, 2625, 2441, 2296, 1975, 1899, 1796, 1644, 1611, 1564, 1525, 1483, 1445, 1383, 1342, 1266, 1151, 1066, 1031, 948, 917, 822, 754, 735, 656, 637, 573, 517  $\text{cm}^{-1}$ .

#### Scheme 4

**Preparation of protonated pyridinium salts (4a-4e).** In a glovebox, the corresponding pyridine (12.4 mmol) was dissolved in 15 mL  $\text{CH}_2\text{Cl}_2$ . Triflic acid (1.7 g/mL; 1.1 mL, 12.4 mmol) was added dropwise to the pyridine-containing solution. The solutions were then stirred at rt for 1 h. The pyridinium salts precipitated out of the solution at the conclusion of the reaction. The supernatant solutions were decanted, and the resultant solids were washed with  $\text{CH}_2\text{Cl}_2$  (3 x 10 mL). The pyridinium salts were then recrystallized from  $\text{CH}_2\text{Cl}_2$  at  $-20$  °C prior to photophysical measurements.

## UV-Vis/Fluorescence Data

Compounds **3a-e** were recrystallized from a concentrated  $\text{CH}_2\text{Cl}_2$  solution at  $-20\text{ }^\circ\text{C}$  prior to making the photophysical measurements.

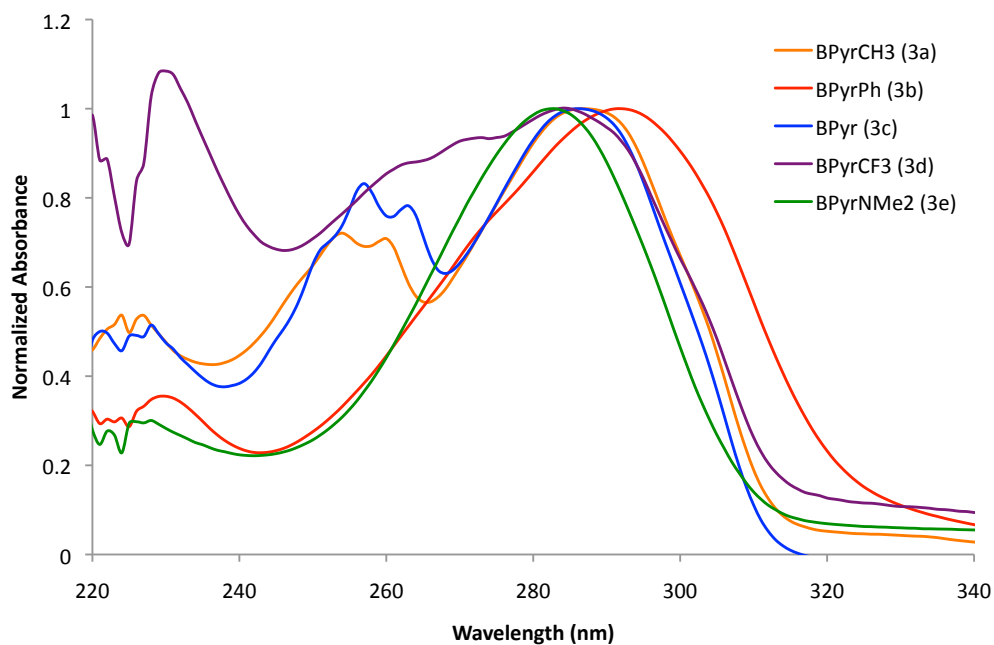

Figure S1. Normalized absorption spectra for **3a-e** in  $\text{CH}_2\text{Cl}_2$ .

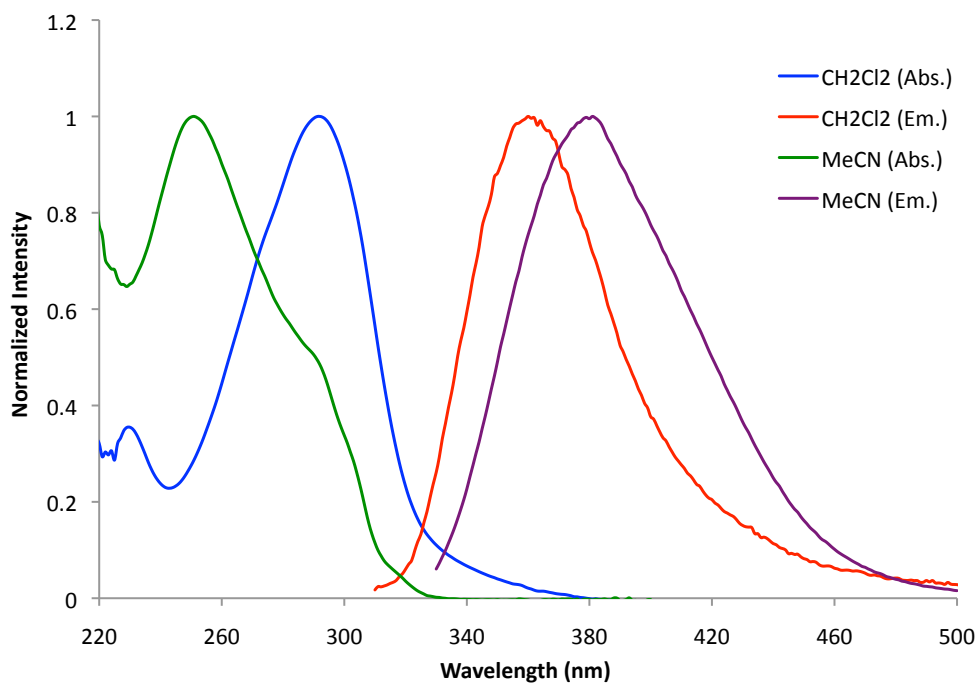

Figure S2. Normalized absorption and emission spectra for **3b** in  $\text{CH}_2\text{Cl}_2$  and MeCN.

**Solid-state fluorescence.** Solid-state fluorescence data were recorded using an integrating sphere. Crystalline samples of substrates **3** or **4** were added to a 0.5 mL cylindrical cuvette in an inert atmosphere glovebox and sealed with a teflon plug. In all cases, the crystalline samples adhered to the side of the cuvette, ensuring that the excitation light was in line with the sample. In cases where no emission was observed, several attempts were made to align the crystalline samples at the appropriate level within the integrating sphere. Solid-state fluorescence data for **3a-e** are presented in the main text.

**Solution-phase fluorescence quenching with iodide.** To a solution of **3b** in MeCN ( $10^{-4}$  M, 4.0 mL) were added successive aliquots of solution of NaI in MeCN (20 mg NaI/mL, each aliquot 0.05–0.2 mL). The emission spectrum of **3b** was recorded immediately after each aliquot was added, the results of which are shown in Figure S3. A control experiment was performed wherein a sample of **3b** in MeCN ( $10^{-4}$  M, 4.0 mL) was diluted with MeCN only (each aliquot 0.2–1.0 mL); the fluorescence intensity did not precipitously drop off in this case, indicating that the addition of NaI resulted in fluorescence quenching.

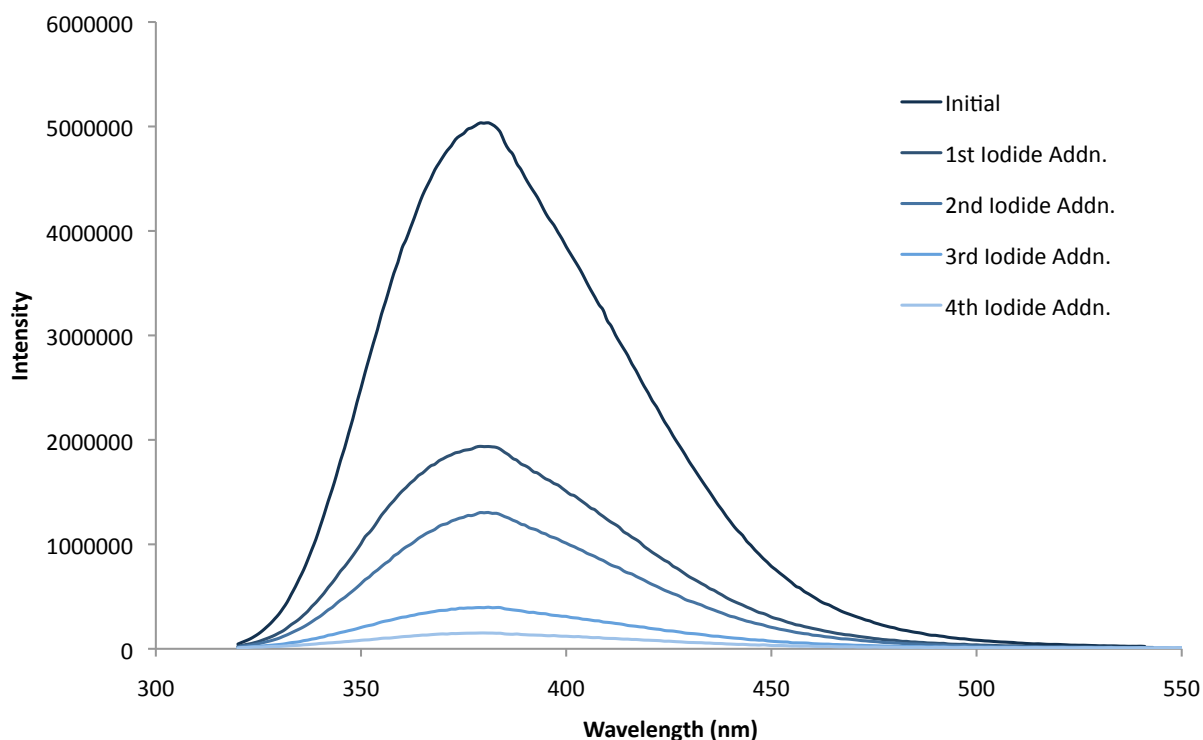

**Figure S3.** Emission spectra of **3b** in MeCN upon addition of NaI.
